# Supplementary material
Source: publisher figshare collection journal article supplement (https://karger.figshare.com/ndownloader/files/17433944)
Supplement: Supplementary file 1 [file 17433944]

**Supplemental Figure 2**. Axial T2-weighted MRI with different grades of ventricular dilatation (VD) according to TAS. A) 1 = mild dilatation, but clear concave shape; B) 2 = moderate VD, borderline shape; C) 3 = severe VD (right), rounded ventricular horns, convex shape
